# Supplementary material
Source: MDPI journal article supplement (https://www.mdpi.com/2079-6412/13/5/919)
Supplement: s1 [file s1]

Supplementary materials

# Efficacy evaluation of Cu- and Ag-based antibacterial treatments on polypropylene fabric and comparison with commercial products

Nunzia Gallo <sup>1,\*</sup>, Giorgia Natalia Iaconisi <sup>2</sup>, Mauro Pollini <sup>1</sup>, Federica Paladini <sup>1</sup>, Sudipto Pal <sup>1,3</sup>, Concetta Nobile <sup>4</sup>, Loredana Capobianco <sup>2</sup>, Antonio Licciulli <sup>1</sup>, Giovanna Giuliana Buonocore <sup>5</sup>, Antonella Mansi <sup>6</sup>, Luca Salvatore <sup>1</sup> and Alessandro Sannino <sup>1</sup>

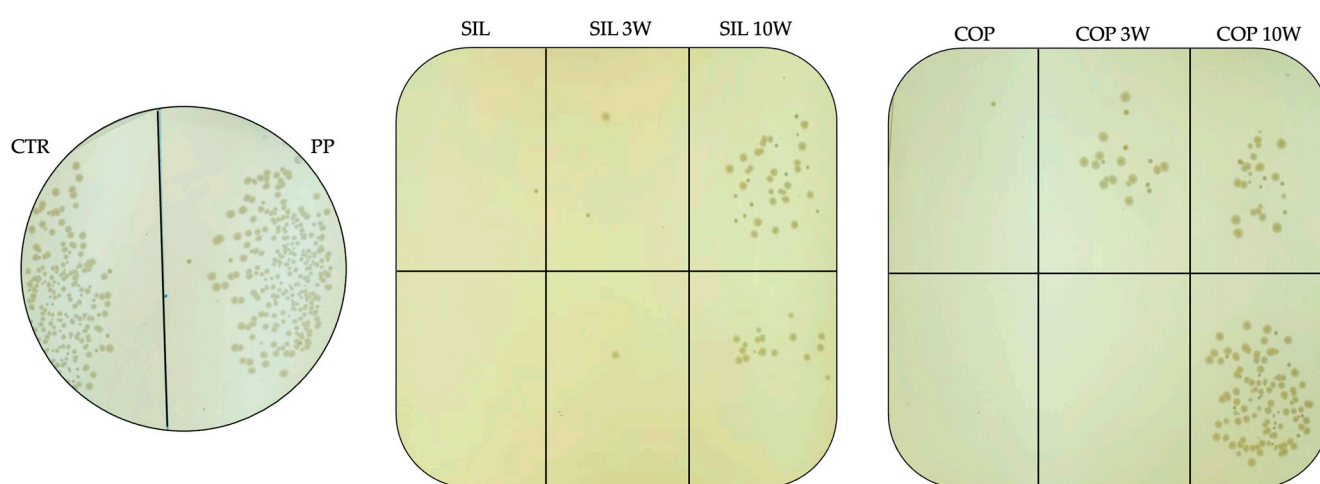

**Figure S1.** Growth plate of *E. coli* after incubation with PP, SIL and COP.

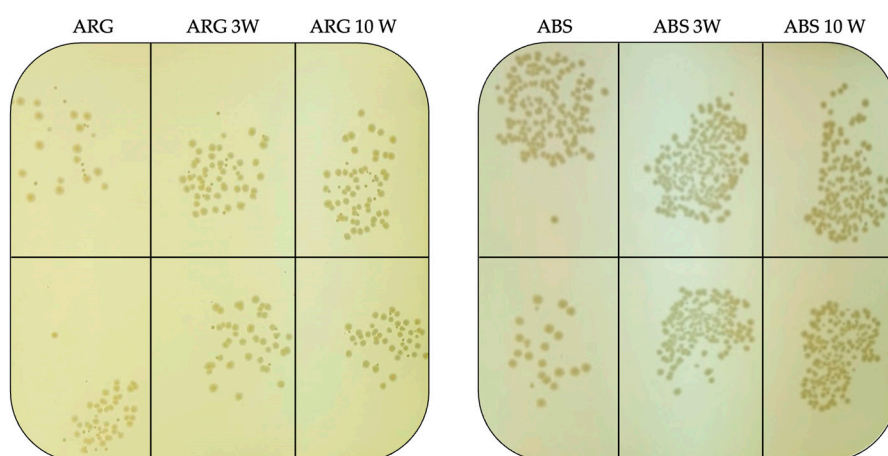

**Figure S2.** Growth plate of *E. coli* after incubation with ARG and ABS.

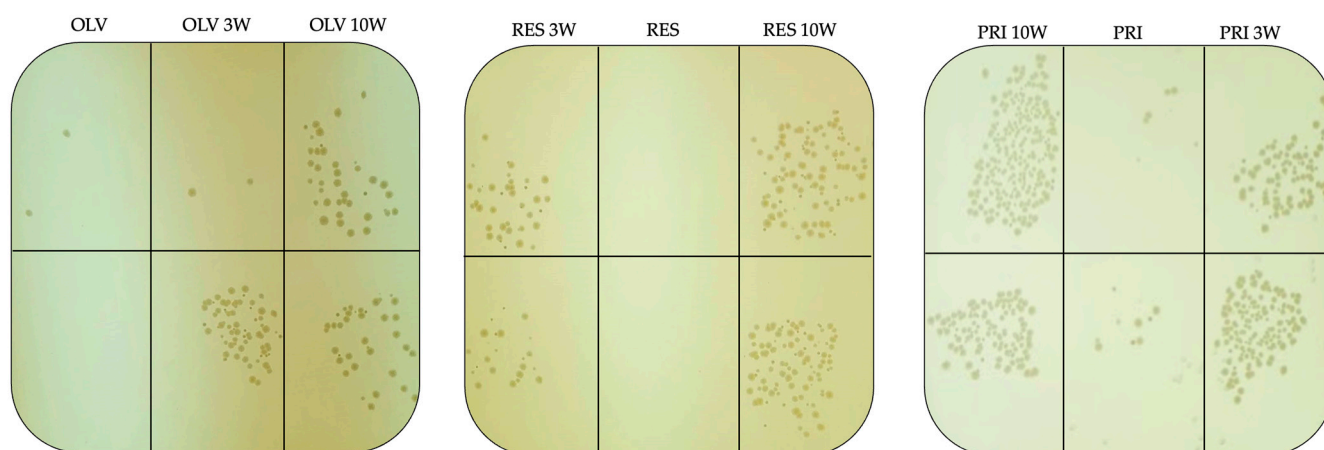

**Figure S3.** Growth plate of *E. coli* after incubation with OLV, RES and PRI.

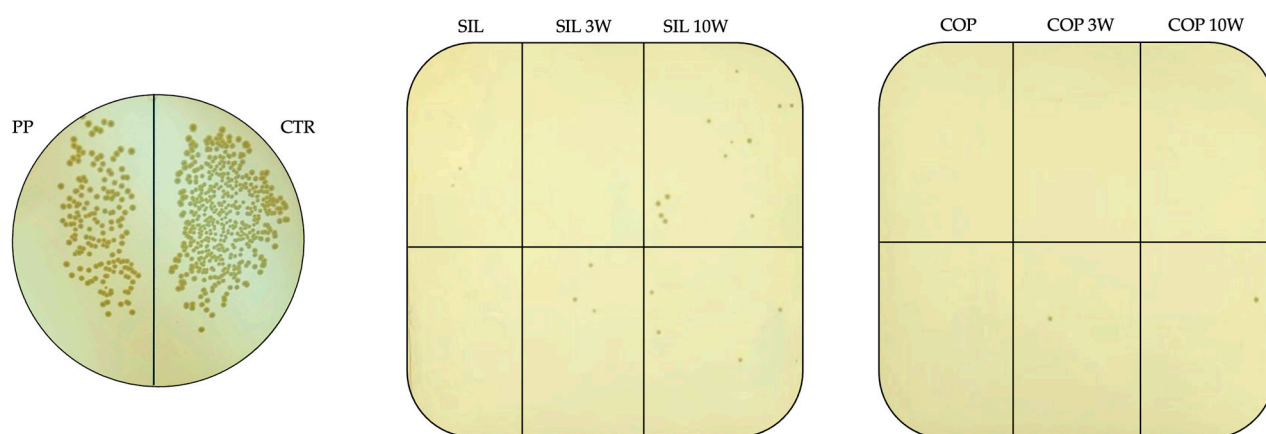

**Figure S4.** Growth plate of *S. aureus* after incubation with PP, SIL and COP.

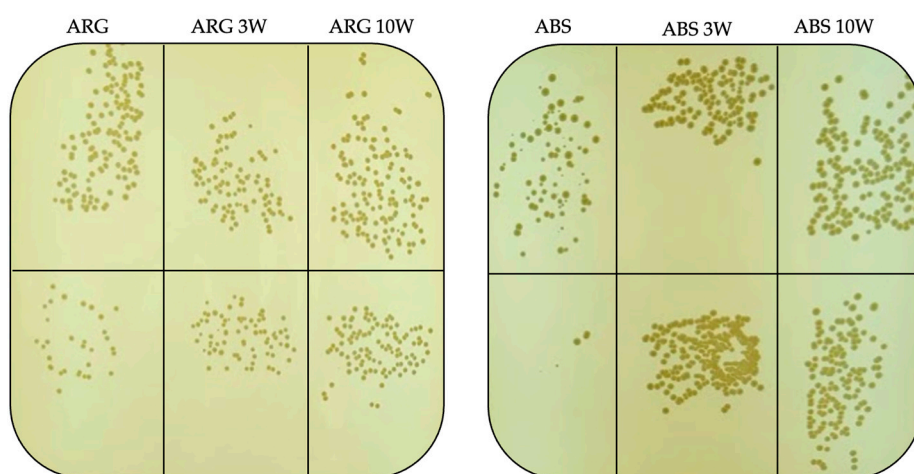

**Figure S5.** Growth plate of *S. aureus* after incubation with ARG and ABS.

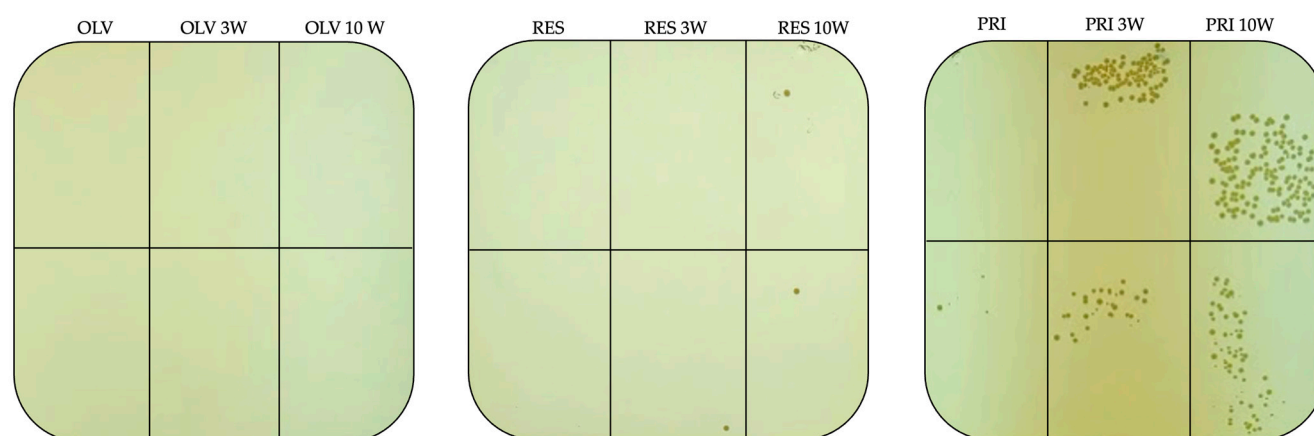

**Figure S6.** Growth plate of *S. aureus* after incubation with OLV, RES and PRI.
